# Supplementary material for: Quantifying Levels of Peste Des Petits Ruminants (PPR) Virus in Excretions from Experimentally Infected Goats and Its Importance for Nascent PPR Eradication Programme
Source: PubMed Central journal article supplement (PMC6466160; doi:10.3390/v11030249), 2019-03-12
Supplement: viruses-11-00249-s001.pdf [file viruses-11-00249-s001.pdf]

**Table S1.** Peak level and timing of peak of peste des petits ruminants virus (PPRV) RNA in goats for different sample types and strains.

| parameter                                                                   | fixed effects |                | random effects        |
|-----------------------------------------------------------------------------|---------------|----------------|-----------------------|
|                                                                             | estimate†     | standard error | animal‡               |
| level of peak viral shedding ( $\log_{10}$ RNA copies/ml; $\alpha$ )        |               |                |                       |
| Ghana, blood (baseline)                                                     | 5.48          | 0.61           |                       |
| Ghana, eye swab                                                             | -0.84         | 1.02           |                       |
| Ghana, nasal swab                                                           | 1.04          | 0.86           |                       |
| Ghana, saliva                                                               | -0.46         | 0.91           | 1.18                  |
| Morocco, blood                                                              | -1.13         | 0.86           |                       |
| Morocco, eye swab                                                           | <b>-2.90</b>  | 0.87           |                       |
| Morocco, nasal swab                                                         | -0.11         | 0.88           |                       |
| Morocco, saliva                                                             | -1.59         | 0.88           |                       |
| time of peak viral shedding (days post challenge; $\beta$ )                 |               |                |                       |
| Ghana, blood (baseline)                                                     | 7.07          | 0.42           |                       |
| Ghana, eye swab                                                             | <b>1.30</b>   | 0.55           |                       |
| Ghana, nasal swab                                                           | <b>2.80</b>   | 0.83           |                       |
| Ghana, saliva                                                               | <b>1.10</b>   | 0.55           | 0.76                  |
| Morocco, blood                                                              | 0.47          | 0.68           |                       |
| Morocco, eye swab                                                           | -0.71         | 0.69           |                       |
| Morocco, nasal swab                                                         | <b>2.81</b>   | 0.79           |                       |
| Morocco, saliva                                                             | 0.58          | 0.62           |                       |
| time of maximum increase in viral shedding (days post challenge; $\gamma$ ) |               |                |                       |
| Ghana, blood (baseline)                                                     | 3.10          | 0.33           |                       |
| Ghana, eye swab                                                             | <b>-2.51</b>  | 0.35           |                       |
| Ghana, nasal swab                                                           | <b>2.56</b>   | 0.88           |                       |
| Ghana, saliva                                                               | <b>-2.30</b>  | 0.34           | $7.03 \times 10^{-6}$ |
| Morocco, blood                                                              | <b>1.37</b>   | 0.60           |                       |
| Morocco, eye swab                                                           | -0.65         | 0.47           |                       |
| Morocco, nasal swab                                                         | <b>2.62</b>   | 0.86           |                       |
| Morocco, saliva                                                             | -0.61         | 0.43           |                       |

† the mean parameter for each sample type and strain is the estimate for the baseline plus that for the specific sample type and strain; values shown in bold are significantly ( $P < 0.05$ ) different from zero

‡ standard deviation in parameter for between-animal variation; common to all sample types and strains

**Table S2.** Temporal changes in the proportion of samples positive for peste des petits ruminants virus (PPRV) RNA in goats for different sample types and strains.

| parameter            | estimate <sup>†</sup> | standard error |
|----------------------|-----------------------|----------------|
| intercept            |                       |                |
| blood (baseline)     | -9.62                 | 1.96           |
| eye swab             | 2.51                  | 2.25           |
| nasal swab           | 6.02                  | 2.17           |
| saliva               | 1.81                  | 2.26           |
| linear term (dpc)    |                       |                |
| blood (baseline)     | 3.66                  | 0.61           |
| eye swab             | -1.88                 | 0.68           |
| nasal swab           | -2.62                 | 0.93           |
| saliva               | -1.50                 | 0.69           |
| quadratic term (dpc) |                       |                |
| blood (baseline)     | -0.21                 | 0.04           |
| eye swab             | 0.11                  | 0.04           |
| nasal swab           | 0.27                  | 0.12           |
| saliva               | 0.09                  | 0.04           |

<sup>†</sup> the coefficient for each sample type is the estimate for the baseline plus that for the specific sample type
